# Supplementary material for: A multicolor-switchable fluorescent lanthanide MOFs triggered by anti-cancer drugs: multifunctional platform for anti-cancer drug sensing and information anticounterfeiting
Source: Royal Society of Chemistry journal article supplement (doi:10.1039/d1tc05935a), 2022-01-01
Supplement: d1tc05935a1.pdf [file d1tc05935a1.pdf]

# Supporting Information

## A Multicolor-Switchable Fluorescent Lanthanide MOFs Triggered by Anti-cancer Drugs: Multifunctional Platform for Anti-cancer Drug Sensing and Information Anticounterfeiting

Yu Zhang<sup>a</sup>, Xin Xu<sup>a</sup> and Bing Yan<sup>\*a,b</sup>

<sup>a</sup>Shanghai Key Lab of Chemical Assessment and Sustainability, School of Chemical Science and Engineering, Tongji

University, Siping Road 1239, Shanghai 200092, China

School of Material Science and Engineering, Liaocheng University, Liaocheng, 252059, China

Corresponding author: Prof. Dr. Bing Yan, Email: [byan@tongji.edu.cn](mailto:byan@tongji.edu.cn)

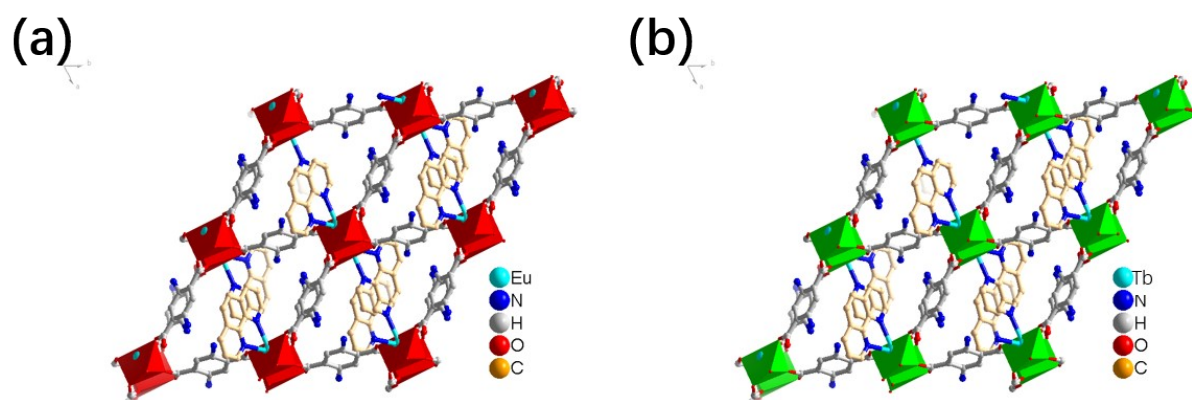

**Figure S1** The detail structure of the (a) Eu-MOFs; (b) Tb-MOFs.

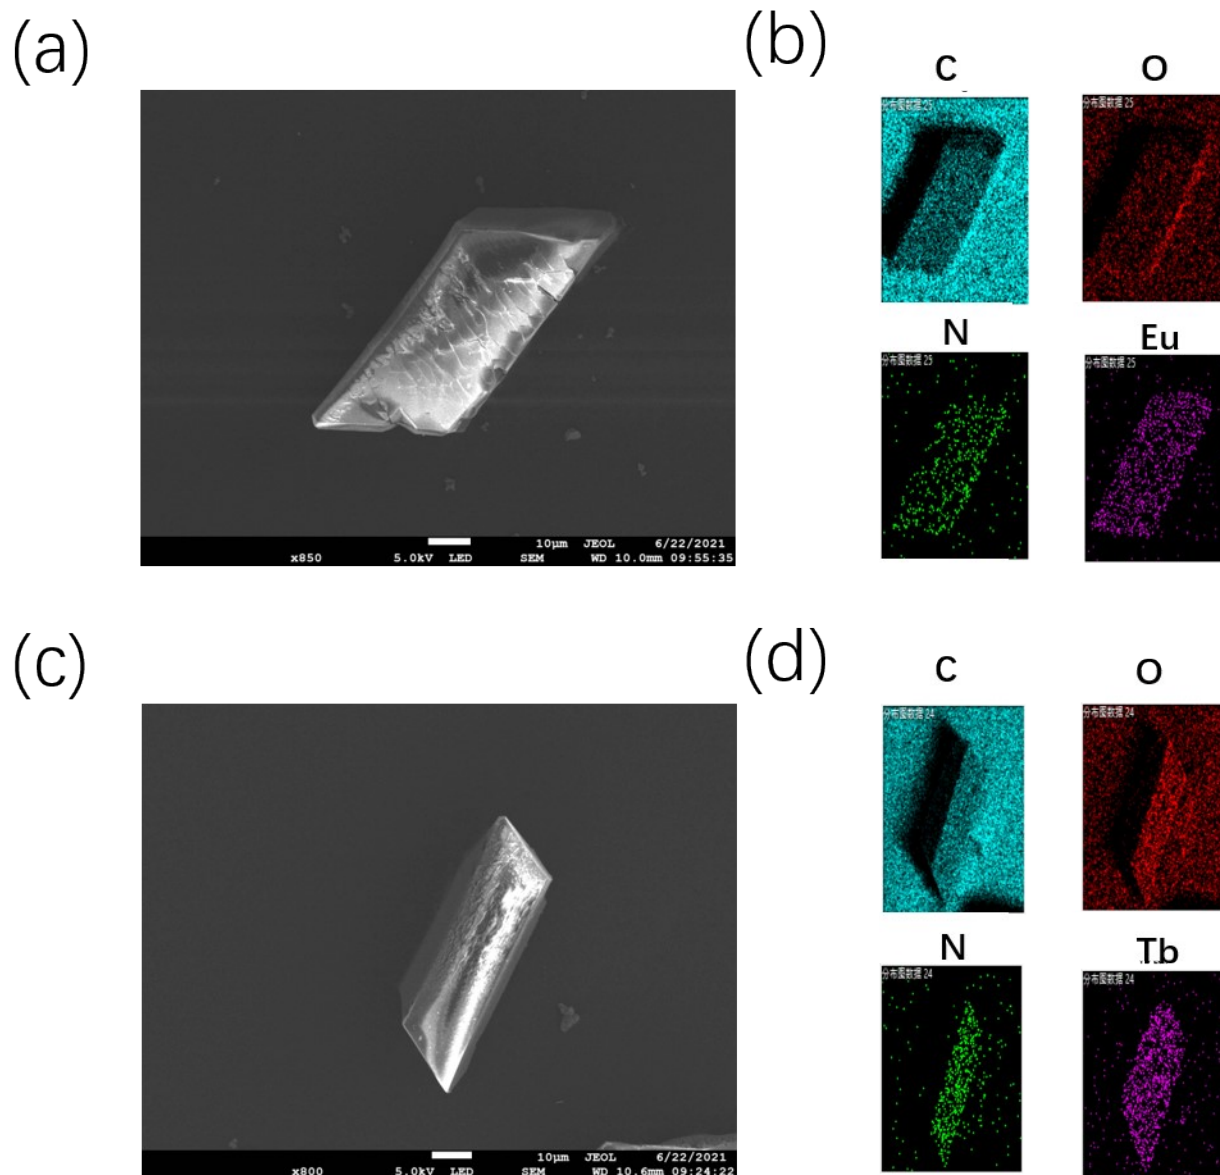

**Figure S2** The SEM image and element mappings of (a) (b) Eu-MOFs; (c) (d) Tb-MOFs.

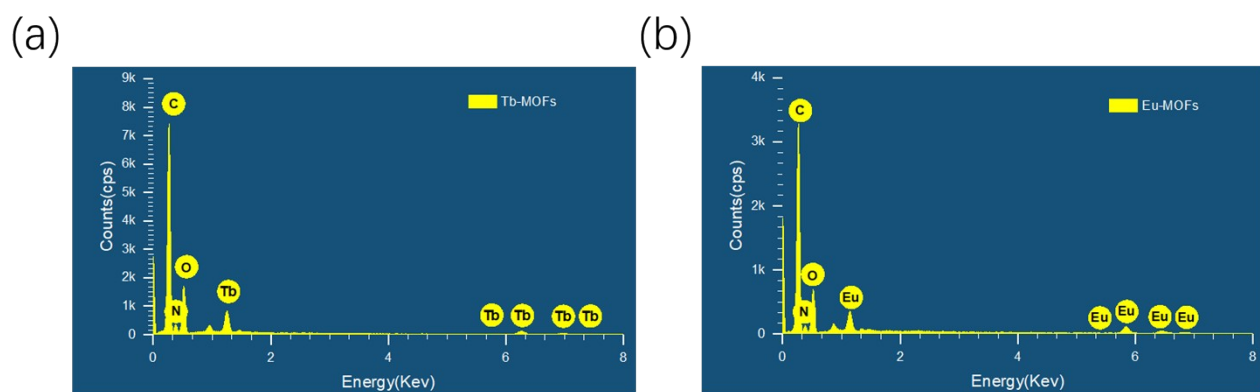

**Figure S3** Energy dispersive X-ray analysis (EDX) spectroscopy of (a) Tb-MOFs and (b) Eu-MOFs.

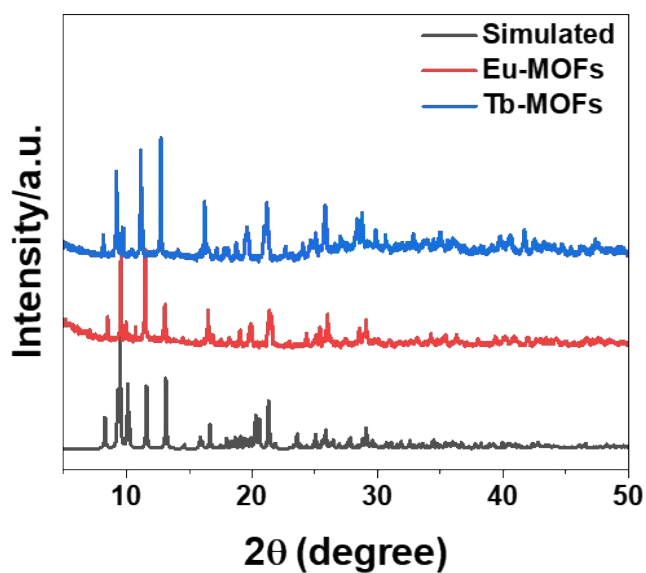

**Figure S4** The PXRD patterns of Eu-MOFs, Tb-MOFs and simulated one.

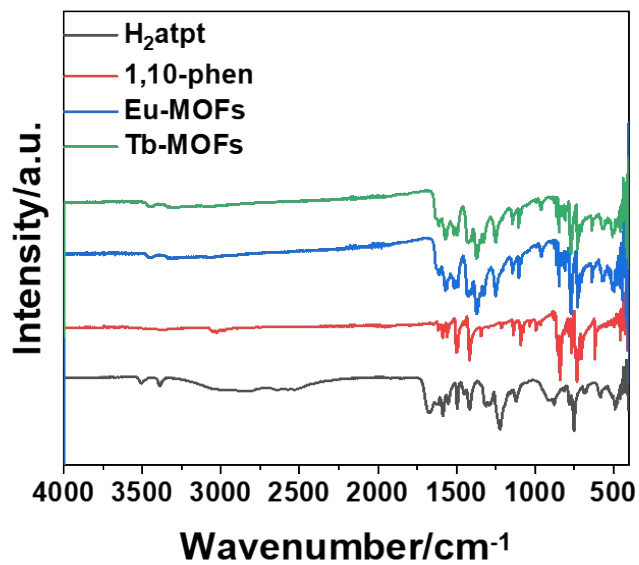

Figure S5 FT-IR spectrum of the H<sub>2</sub>atpt, 1,10-phen, Eu-MOFs and Tb-MOFs.

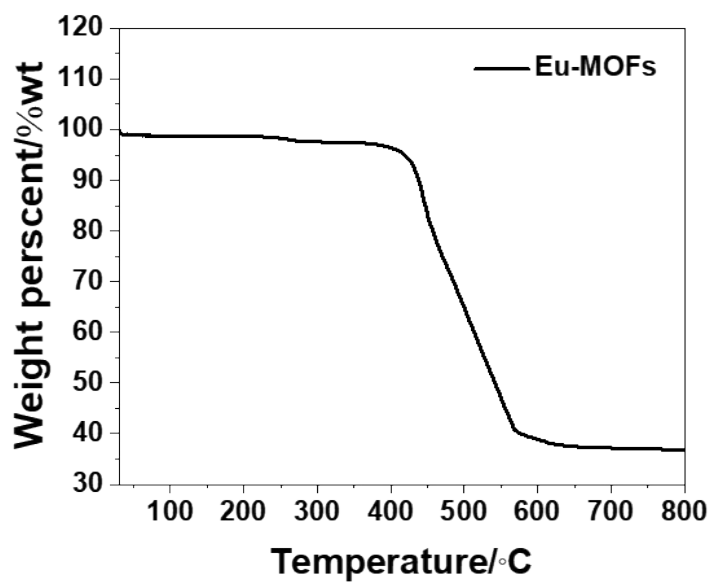

Figure S6 Thermal gravimetric analysis curves for Eu-MOFs.

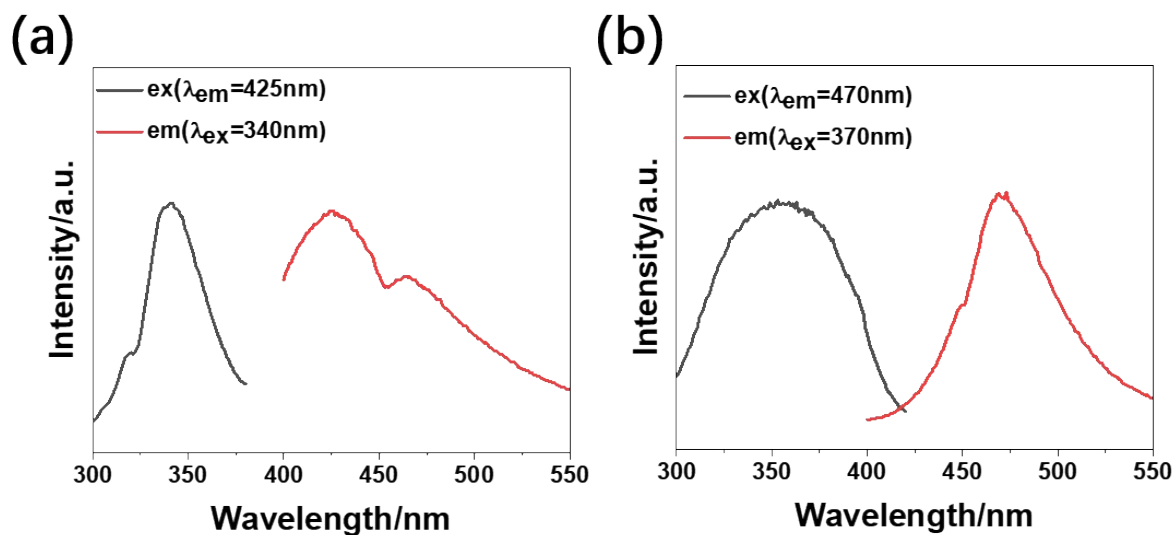

**Figure S7** Excitation (black line) and emission (red line) spectra of (a) 1,10-phen and (b) H<sub>2</sub>atpt.

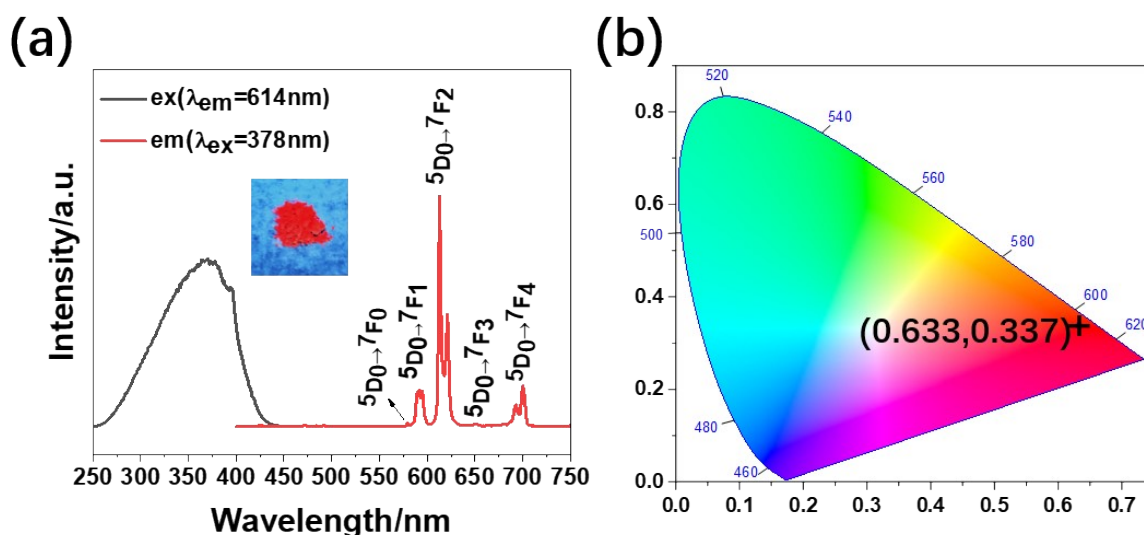

**Figure S8** (a) Excitation (black line) and emission (red line) spectra of Eu-MOFs in solid state (The inset is corresponding photograph under UV light); (b) The corresponding CIE chromaticity diagram of Eu-MOFs.

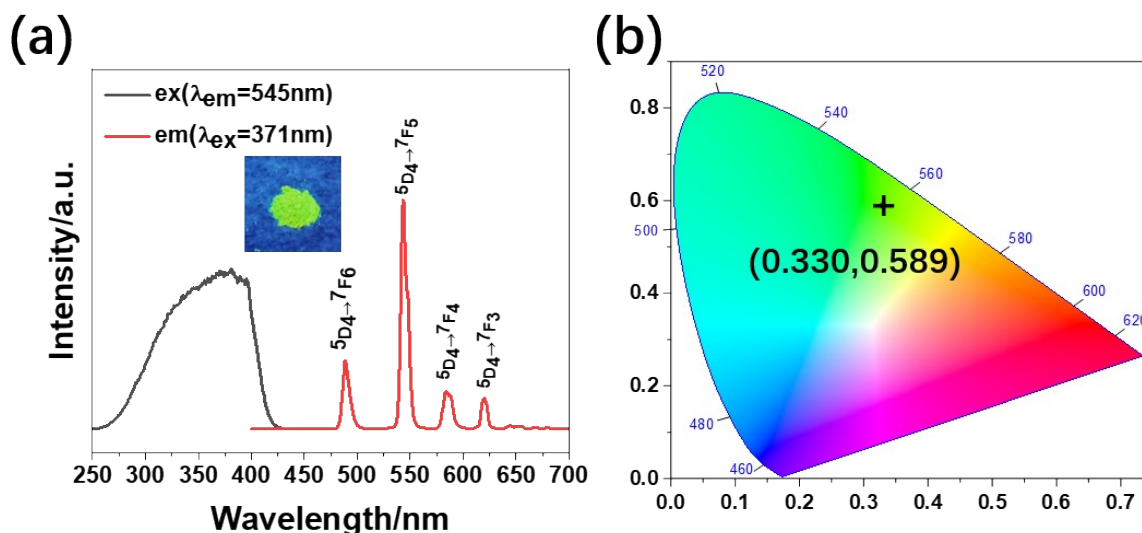

**Figure S9** (a) Excitation (black line) and emission (red line) spectra of Tb-MOFs in solid state (The inset is corresponding photograph under UV light); (b) The corresponding CIE chromaticity diagram of Tb-MOFs.

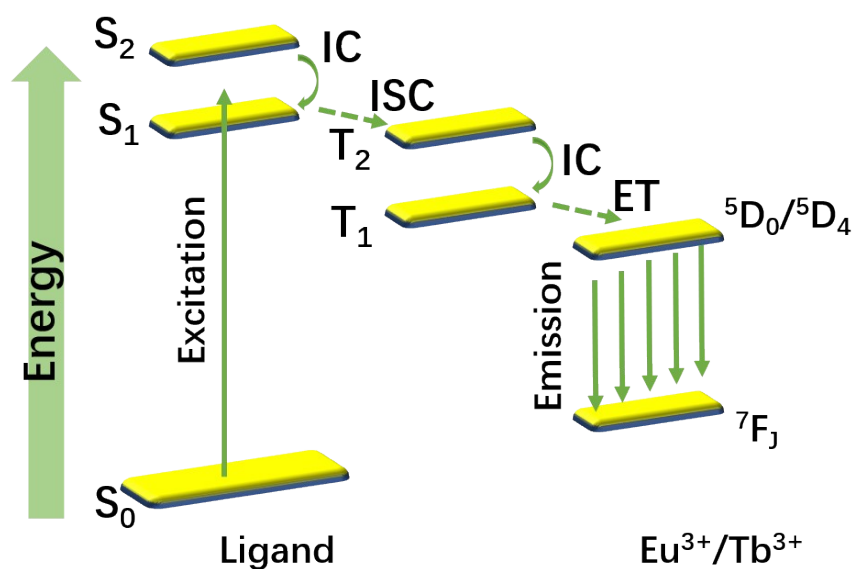

**Figure S10** Energy transfer diagram for ligand and  $\text{Eu}^{3+}/\text{Tb}^{3+}$ ,  $S_0$  = ground states,  $S_1$  and  $S_2$  = excited singlet states,  $T_1$  and  $T_2$  = excited triplet states, IC=internal conversion, ISC=intersystem crossing (non-radiative processes), ET =energy transfer.

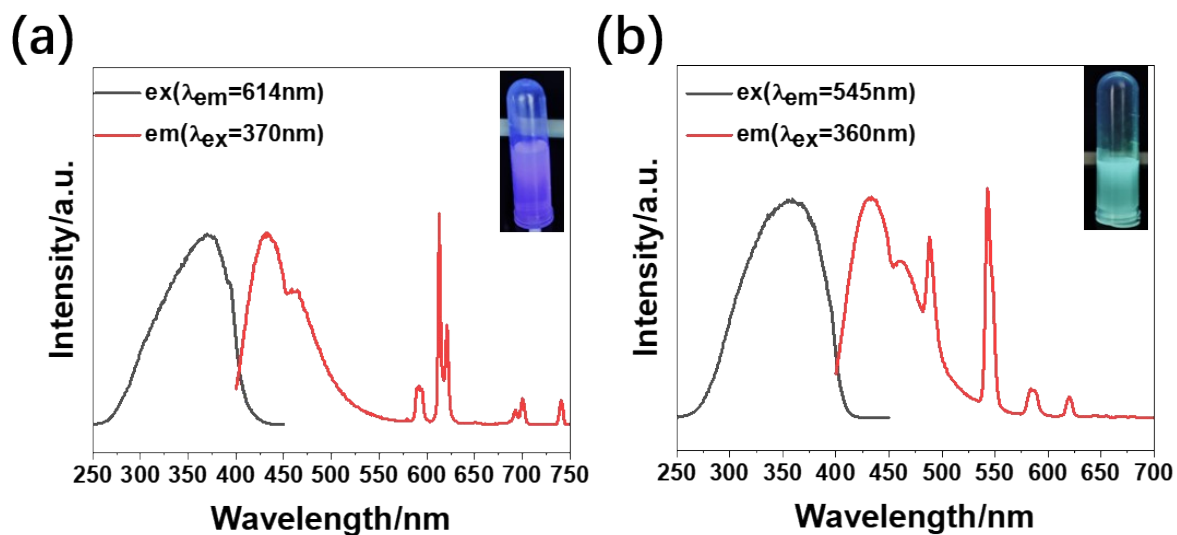

**Figure S11** (a) Excitation (black line) and emission (red line) spectra of Eu-MOFs in aqueous solution (The inset is corresponding photograph under UV light); (a) Excitation (black line) and emission (red line) spectra of Tb-MOFs in H<sub>2</sub>O (The inset is corresponding photograph under UV light)

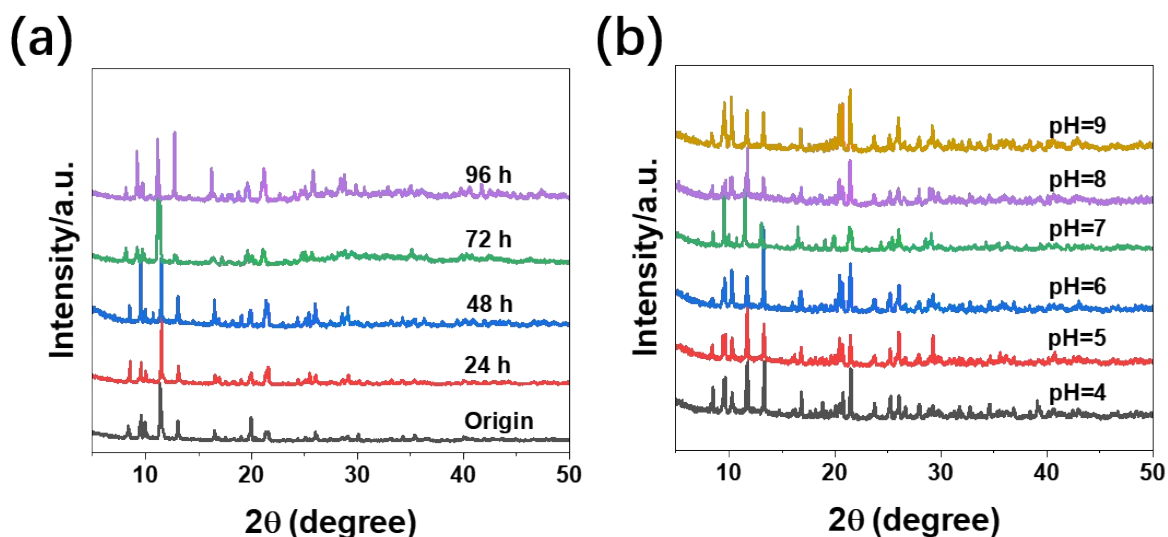

**Figure S12** (a) PXR D of Eu-MOFs after being immersed into aqueous solution for 96 h; (b) PXR D of Eu-MOFs after being immersed into solutions of pH = 4-9.

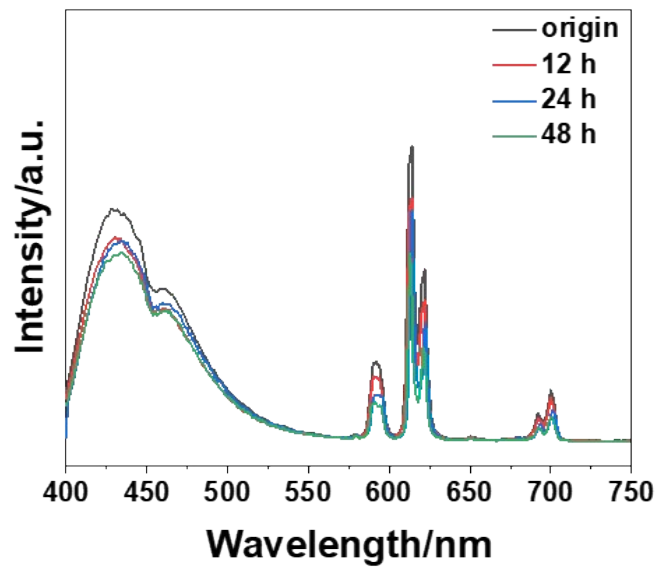

**Figure S13** Emission spectra of Eu-MOFs after being immersed into aqueous solution for 0-48 h.

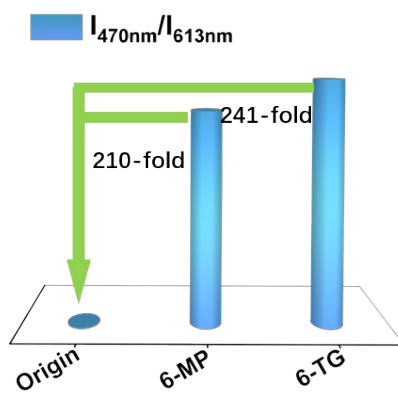

**Figure S14** The corresponding histogram ( $I_{470\text{nm}}/I_{613\text{nm}}$ ) of the original Cu-Eu-MOFs and Cu-Eu-MOFs after the addition of 6-MP and 6-TG.



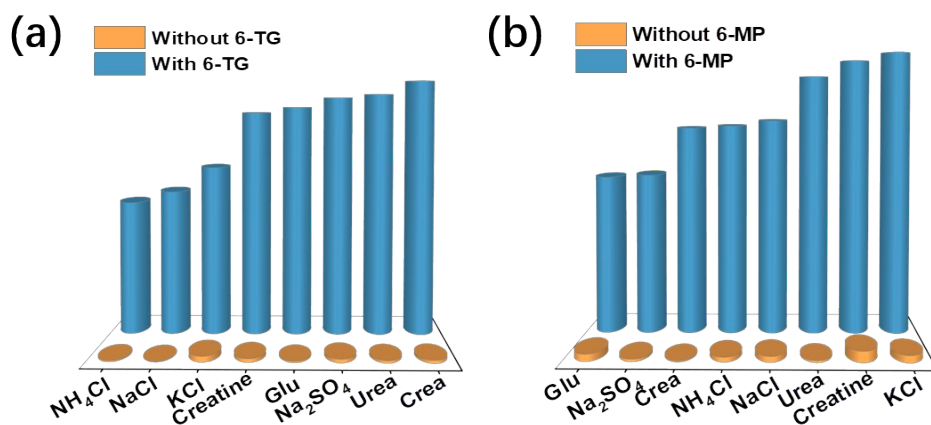

**Figure S15** Luminescence responses of  $I_{470\text{nm}}/I_{613\text{nm}}$  toward other urine components with and without (a) 6-TG; (b) 6-MP.

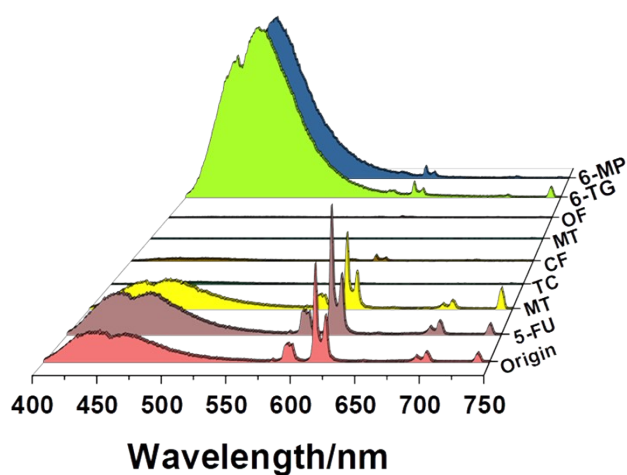

**Figure S16** Luminescence spectra of Cu-Eu-MOFs towards frequently used antibiotics or anti-cancer drugs.

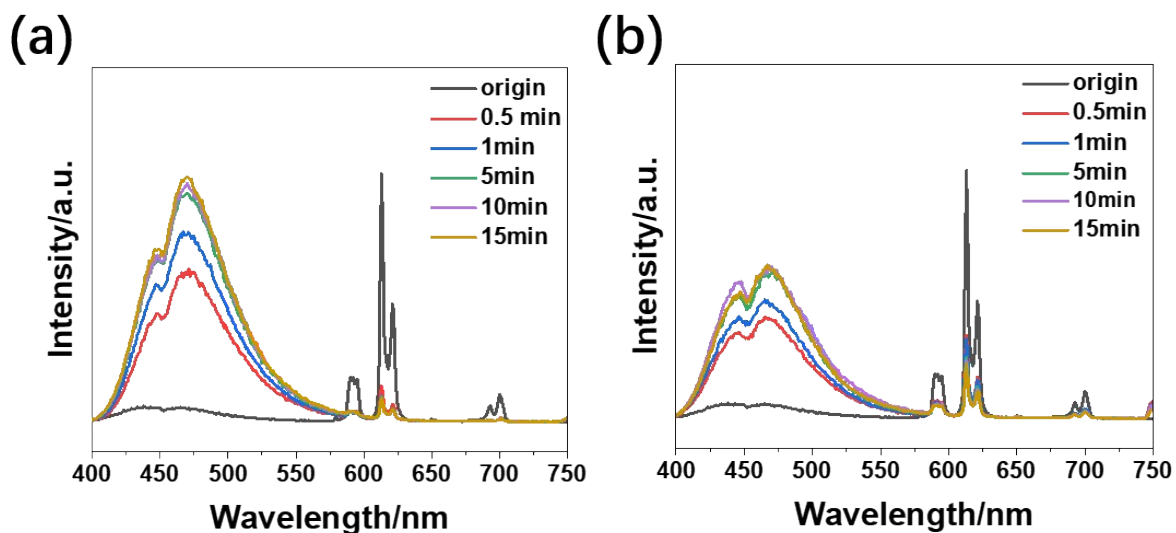

**Figure S17** Variation of luminescent intensity of Eu-MOFs with different immersion time in (a) 6-MP; (b) 6-TG.

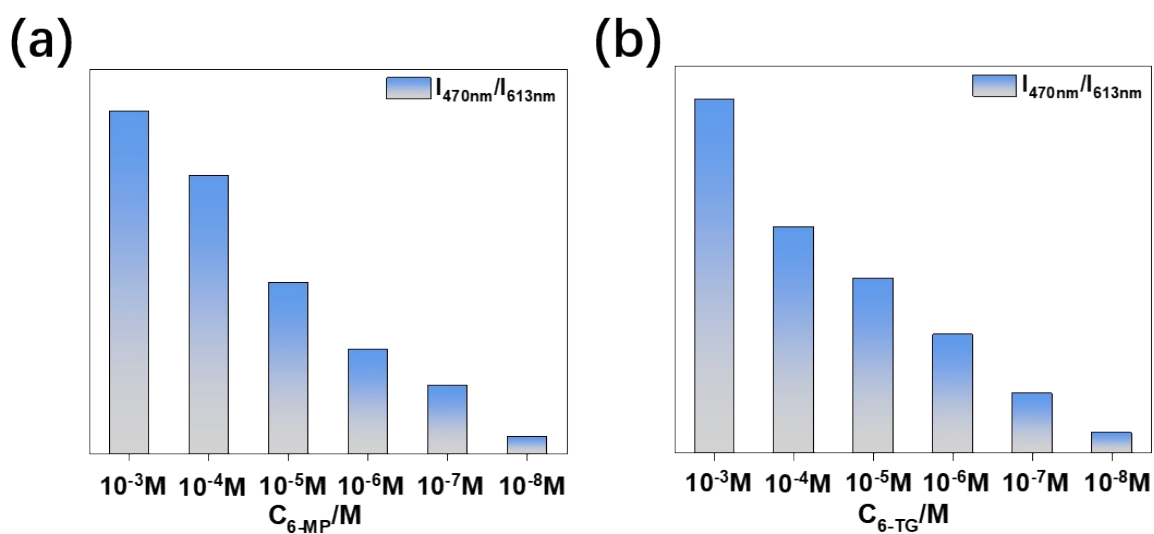

**Figure S18** The column diagram of the fluorescence intensity of Eu-MOFs ( $I_{470\text{nm}}/I_{613\text{nm}}$ ) after immersing into different concentrations of (a) 6-MP; (b) 6-TG in urine sample.

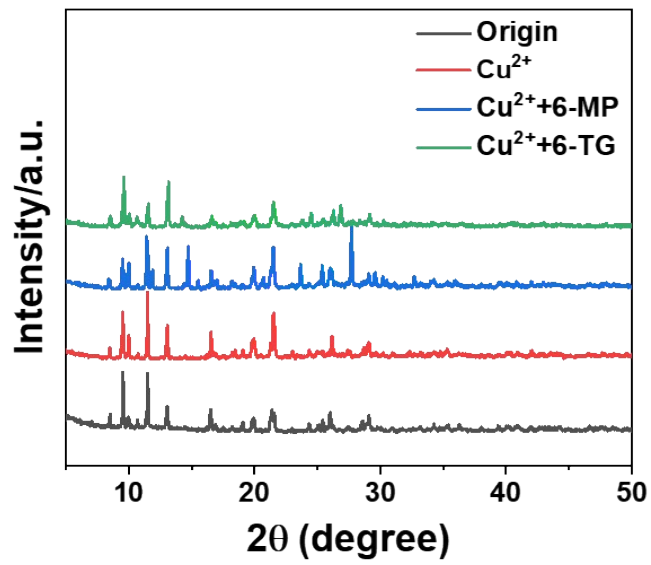

**Figure S19** PXR D patterns of Eu-MOFs after being immersed into H<sub>2</sub>O, Cu<sup>2+</sup>, Cu<sup>2+</sup>+6-MP and Cu<sup>2+</sup>+6-TG.

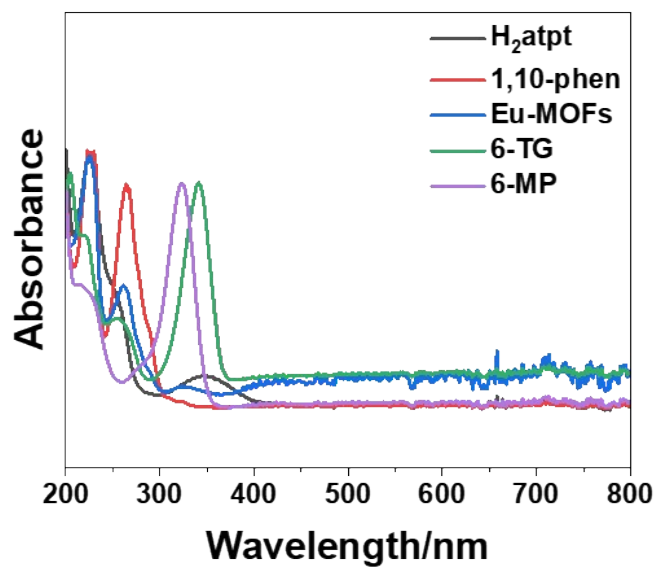

**Figure S20** UV-vis spectra of H<sub>2</sub>atpt, 1,10-phen, Eu-MOFs, 6-TG and 6-MP.

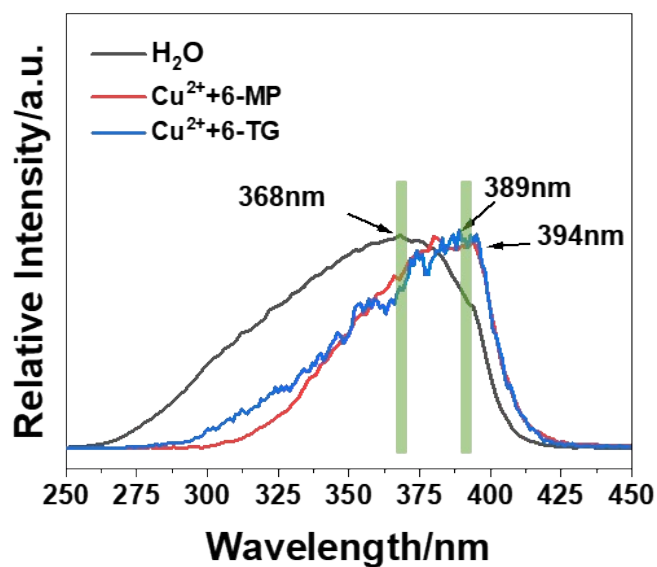

**Figure S21** Excitation spectra of Eu-MOFs in aqueous solution, Cu<sup>2+</sup>+6-MP and Cu<sup>2+</sup>+6-TG.

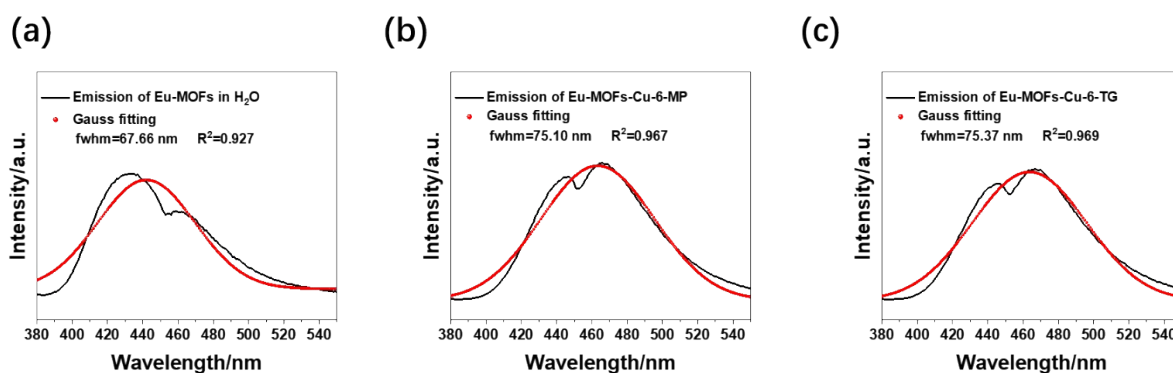

**Figure S22** Emission spectrum Gauss fitting curve of Eu-MOFs in (a) H<sub>2</sub>O; (b) Cu<sup>2+</sup>+6-MP and (c) Cu<sup>2+</sup>+6-TG.

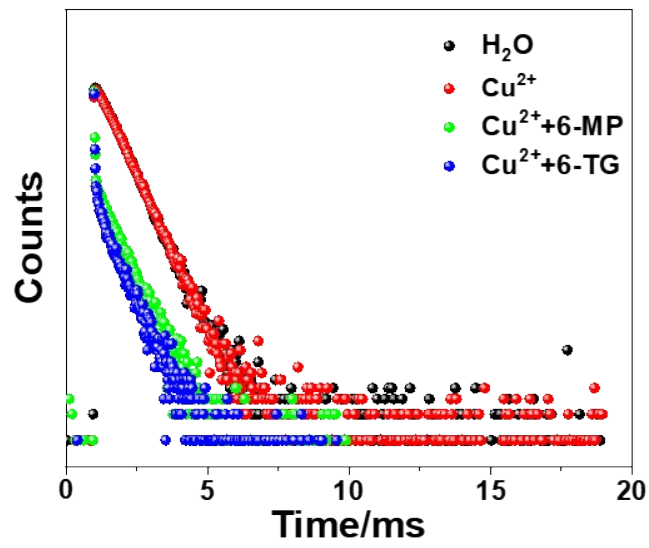

**Figure S23** Luminescence decay curves of Eu-MOFs after being immersed into H<sub>2</sub>O, Cu<sup>2+</sup>, Cu<sup>2+</sup>+6-MP and Cu<sup>2+</sup>+6-TG.

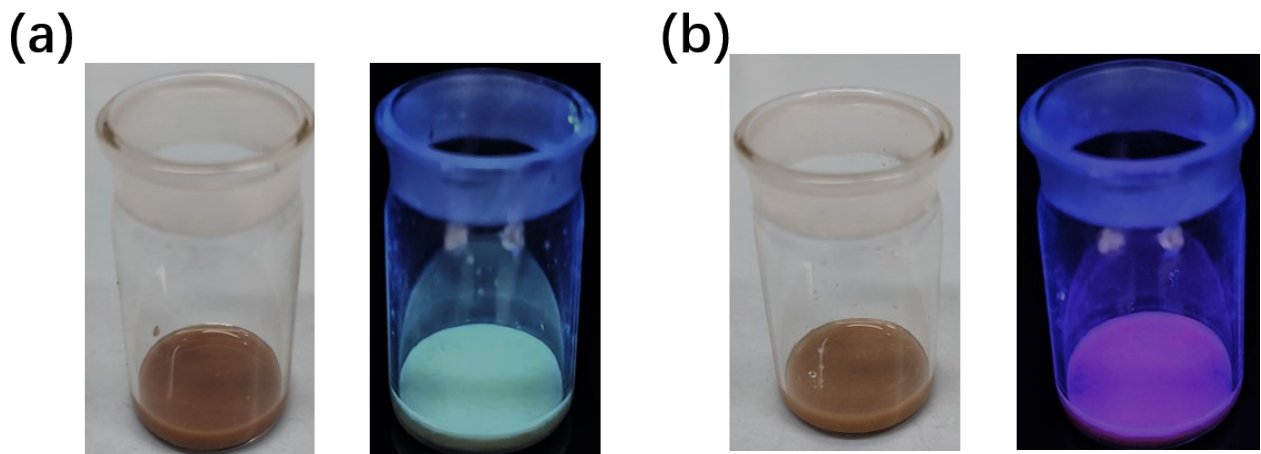

**Figure S24** (a) Photograph of Tb-MOFs inks under daily light (left) and UV light (right); (b) Photograph of Eu-MOFs inks under daily light (left) and UV light (right).

**Table S1** The weight percentage of elements in Eu-MOFs and Tb-MOFs determined by energy dispersive X-ray spectroscopy (EDX).

(a)

| Material | Element | Weight% |
|----------|---------|---------|
| Eu-MOFs  | C       | 54.07   |
|          | N       | 9.92    |
|          | O       | 19.81   |
|          | Eu      | 16.20   |

(b)

| Material | Element | Weight% |
|----------|---------|---------|
| Tb-MOFs  | C       | 53.29   |
|          | N       | 12.48   |
|          | O       | 24.09   |
|          | Tb      | 10.14   |

**Table S2** The luminescence decay times of Eu-MOFs after being immersed into H<sub>2</sub>O, Cu<sup>2+</sup>, Cu<sup>2+</sup>+6-MP and Cu<sup>2+</sup>+6-TG.

| Substance              | Lifetimes |
|------------------------|-----------|
| H <sub>2</sub> O       | 609.11μs  |
| Cu <sup>2+</sup>       | 613.28μs  |
| Cu <sup>2+</sup> -6-MP | 541.66μs  |
| Cu <sup>2+</sup> -6-TG | 527.06μs  |
